# Supplementary material for: SARS-CoV-2 inhibits induction of the MHC class I pathway by targeting the STAT1-IRF1-NLRC5 axis
Source: PubMed Central journal article supplement (PMC8594428; doi:10.1038/s41467-021-26910-8), 2021-11-15
Supplement: 41467_2021_26910_MOESM1_ESM.pdf [file 41467_2021_26910_MOESM1_ESM.pdf]

## Supplementary Information

### **SARS-CoV-2 Inhibits Induction of the MHC Class I Pathway by Targeting the STAT1-IRF1-NLRC5 Axis**

#### **Authors**

Ji-Seung Yoo<sup>1</sup>, Michihito Sasaki<sup>2</sup>, Steven X Cho<sup>1</sup>, Yusuke Kasuga<sup>1</sup>, Baohui Zhu<sup>1</sup>, Ryota Ouda<sup>1</sup>, Yasuko Orba<sup>2,3</sup>, Paul de Figueiredo<sup>4,5</sup>, Hirofumi Sawa<sup>2,3,6</sup>, and Koichi S Kobayashi<sup>1,5</sup>\*

#### **Affiliations**

<sup>1</sup> Department of Immunology, Hokkaido University Graduate School of Medicine, Sapporo 060-8638, Japan.

<sup>2</sup> Division of Molecular Pathobiology, International Institute for Zoonosis Control, Hokkaido University, Sapporo 001-0020, Japan.

<sup>3</sup> International Collaboration Unit, International Institute for Zoonosis Control, Hokkaido University, Sapporo 001-0020, Japan.

<sup>4</sup> Department of Veterinary Pathobiology, Texas A&M University, College Station, TX 77843, USA.

<sup>5</sup> Department of Microbial Pathogenesis and Immunology, Texas A&M Health Science Center, Bryan, TX 77807, USA.

<sup>6</sup> One Health Research Center, Hokkaido University, Sapporo 001-0020, Japan.

\* Corresponding author

# Supplementary Fig. 1.

**a**

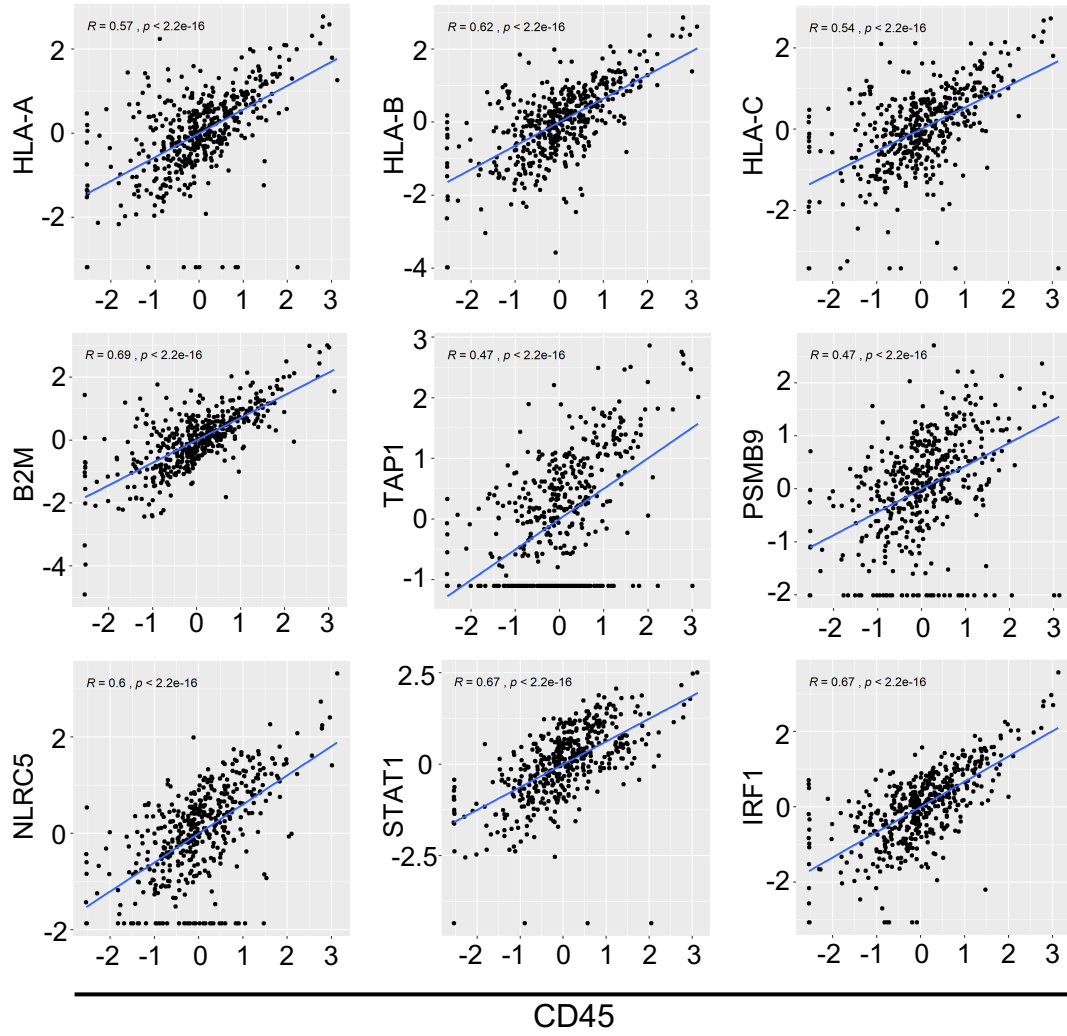

**b**

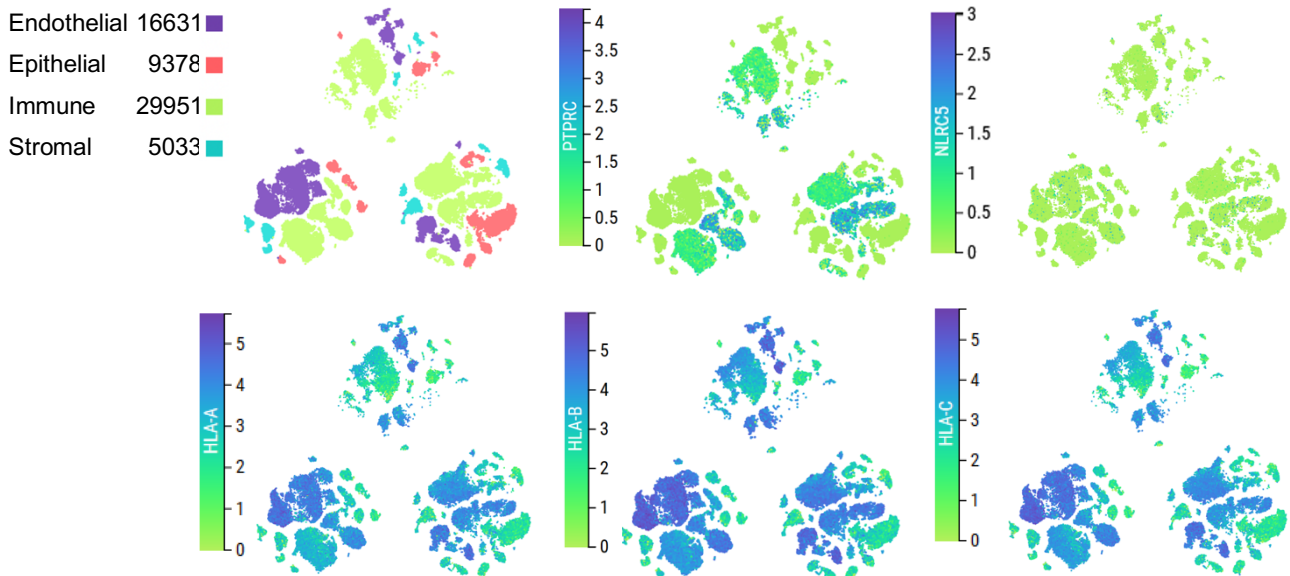

**Supplementary Fig. 1. Immune cells are the predominant source of MHC class I gene expression in airway. a** Scatterplots for the expression of *PTPRC* (CD45) and the indicated MHC class I-related genes from nasopharyngeal swabs of SARS-CoV-2 negative (n=54) and positive (n=413) patients shown in Fig. 1A. Each datapoint represents z-score transformed log2 normalized count for each patient. Spearman's correlation coefficient (*R*) and associated two-sided p-values are indicated. **b** Cellxgene derived (see **Methods**) UMAP representations of single-cell transcriptomes from normal human lung tissue (n=3) annotated by cell type compartments and gene expression of *PTPRC*, *NLRC5*, or MHC class I genes, *HLA-A*, *HLA-B*, and *HLA-C*.

## Supplementary Fig. 2.

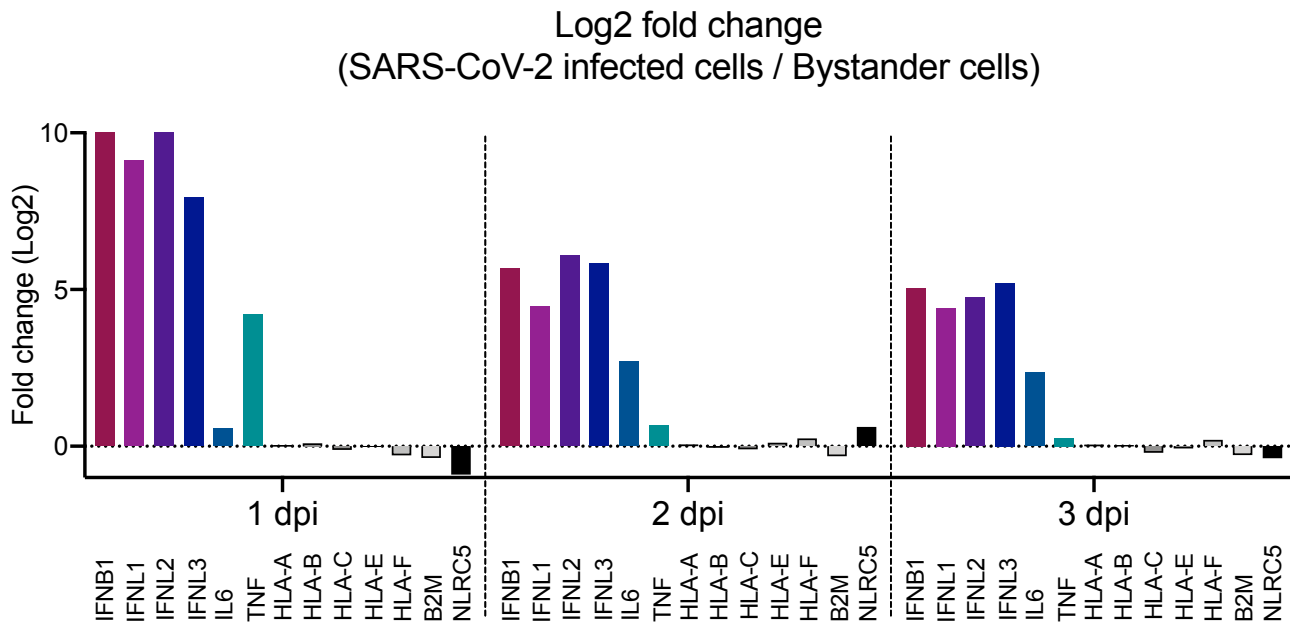

**Supplementary Fig. 2. Suppressed upregulation of the MHC class I pathway in SARS-CoV-2 infected ciliated cells** Single-cell RNA-seq of SARS-CoV-2 infected primary human bronchial epithelial cells over 1-3 days post-infection (dpi) time course was performed and a comparison of log2 fold change in the indicated gene expression between infected or non-infected bystander ciliated cells was assessed. Data assessment with the provided S2 Data published by Ravindra et al is described in **Methods**.

# Supplementary Fig. 3.

**a**

## Caco-2

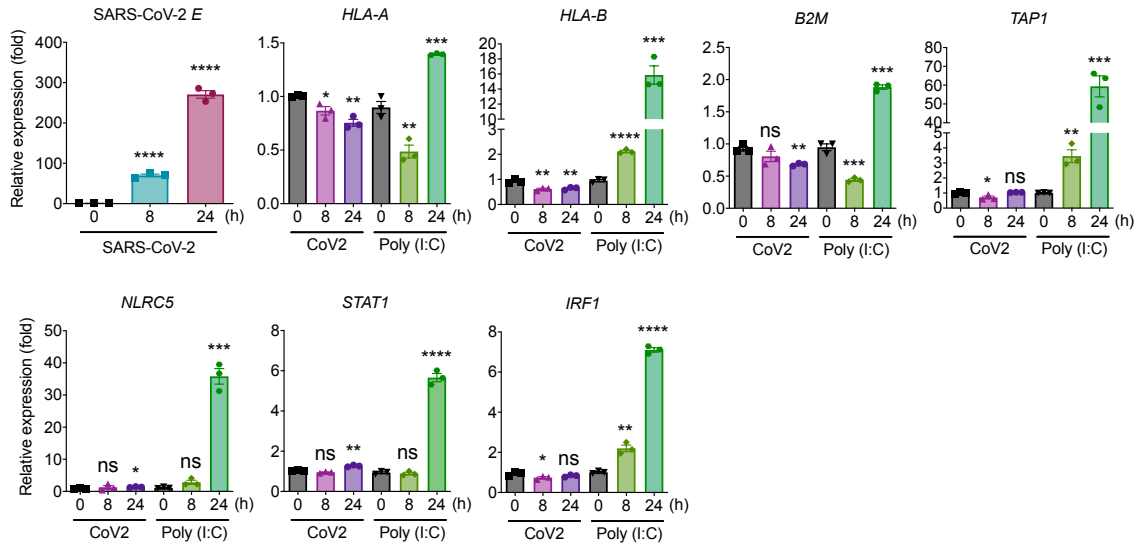

**b**

## Huh7

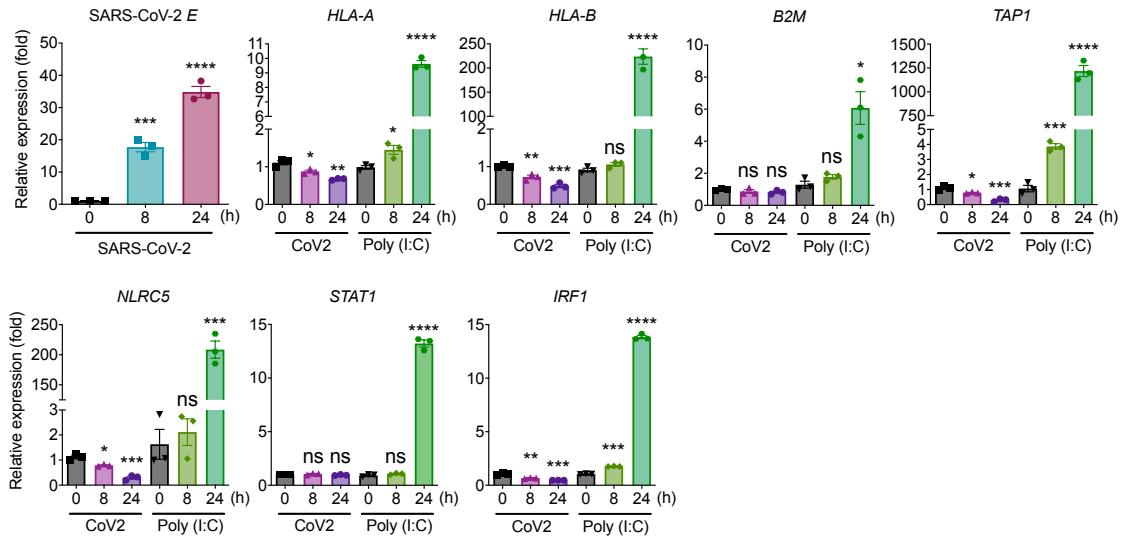

**Supplementary Fig. 3. SARS-CoV-2 inhibits the upregulation of genes in the MHC class I pathway in the colon and liver carcinoma epithelial cells. a and b**

Expression of the MHC class I-related genes by SARS-CoV-2 infection (multiplicity of infection (moi) 3) or poly(I:C) transfection (200 ng) for the indicated time in Caco-2 (**a**) or Huh7 cells (**b**). The results are from 3 independent experiments. Two-tailed unpaired *t*-test, \*,  $P < 0.05$ ; \*\*,  $P < 0.01$ ; \*\*\*,  $P < 0.001$ ; \*\*\*\*,  $P < 0.0001$ ; ns, not significant. The error bars represent mean values  $\pm$  SD. The exact *p*-values are available in the Source Data.

# Supplementary Fig. 4.

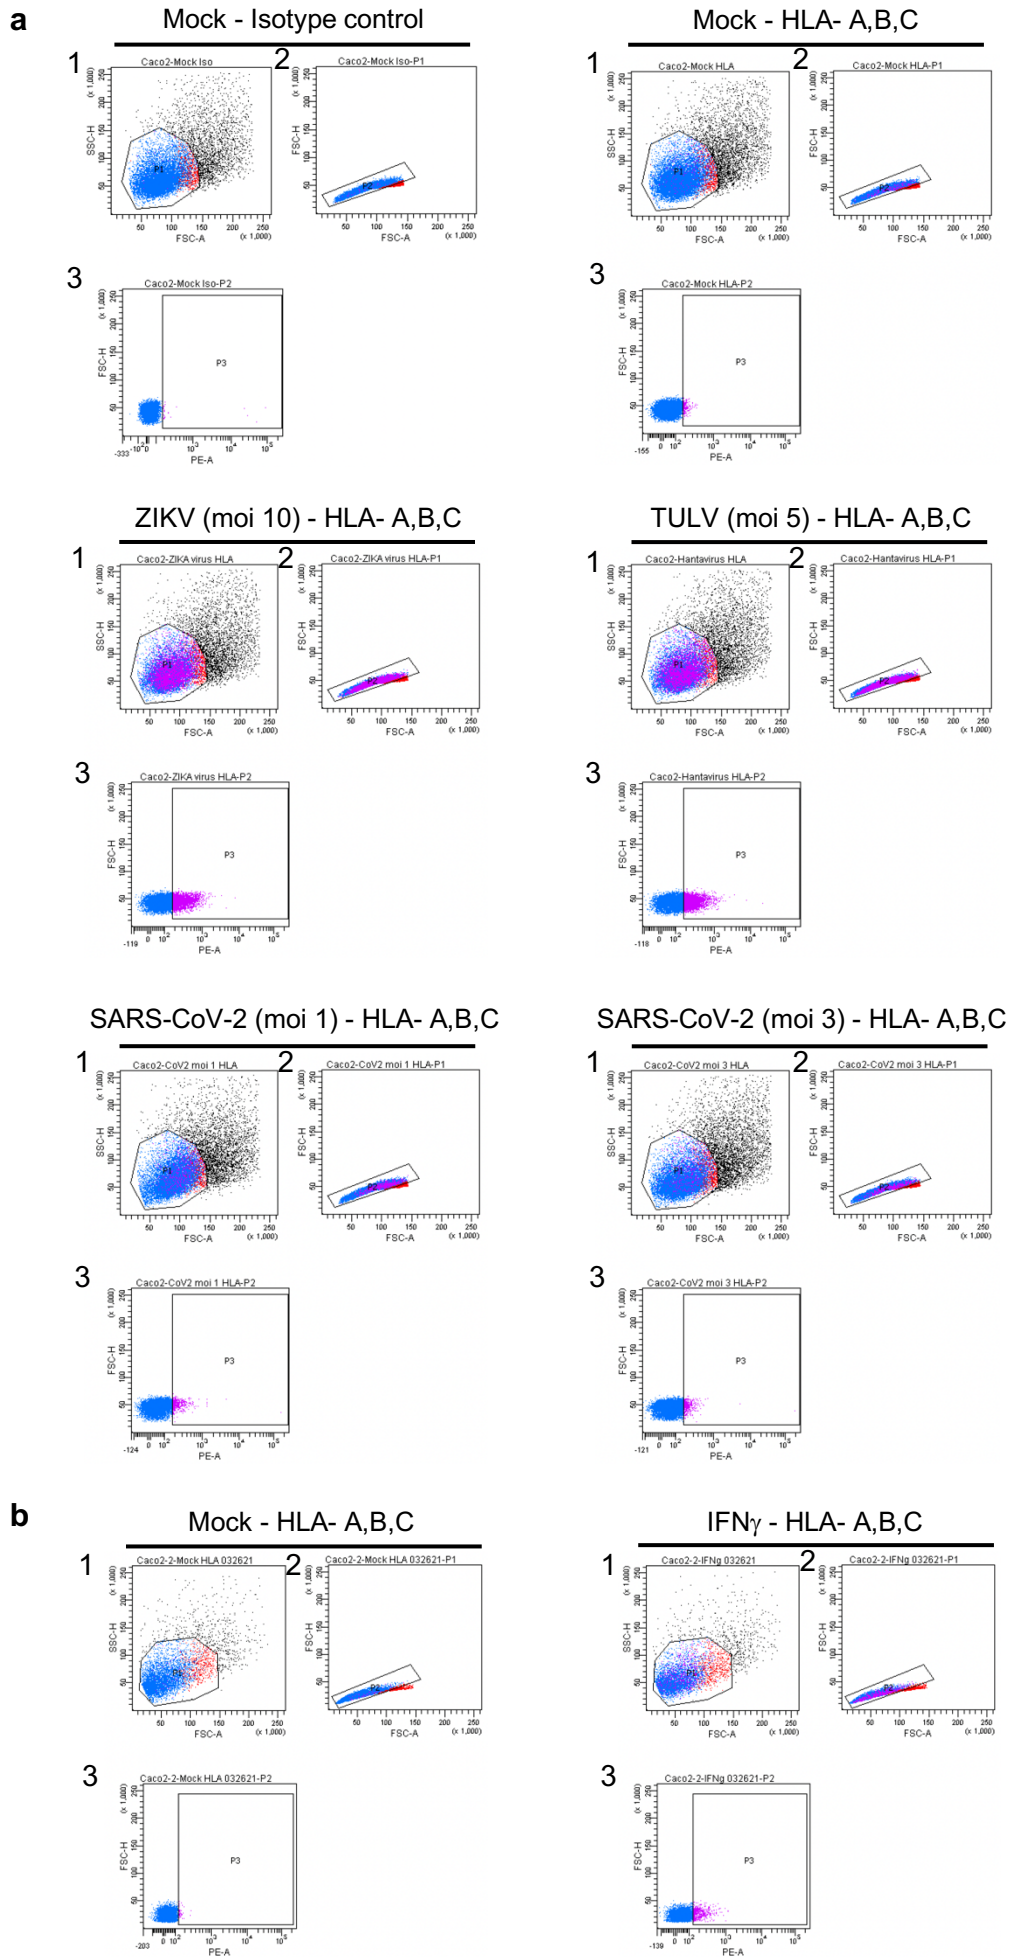

**Supplementary Fig. 4. Suppressed upregulation of the surface expression of the MHC class I proteins by SARS-CoV-2 in Caco-2 cells** The gating strategy for detection of HLA- A,B,C in Caco-2 cells corresponding to Fig. 2c. **(a)** Surface expression of MHC class I upon mock, ZIKV, TULV, or SARS-CoV-2 infection with indicated moi for 48 h. **(b)** Surface expression of MHC class I by either mock or IFN $\gamma$  stimulation for 48h. The gating orders are indicated by numbers. Both isotype control and anti-HLA- A,B,C antibodies are conjugated with PE.



# Supplementary Fig. 5.

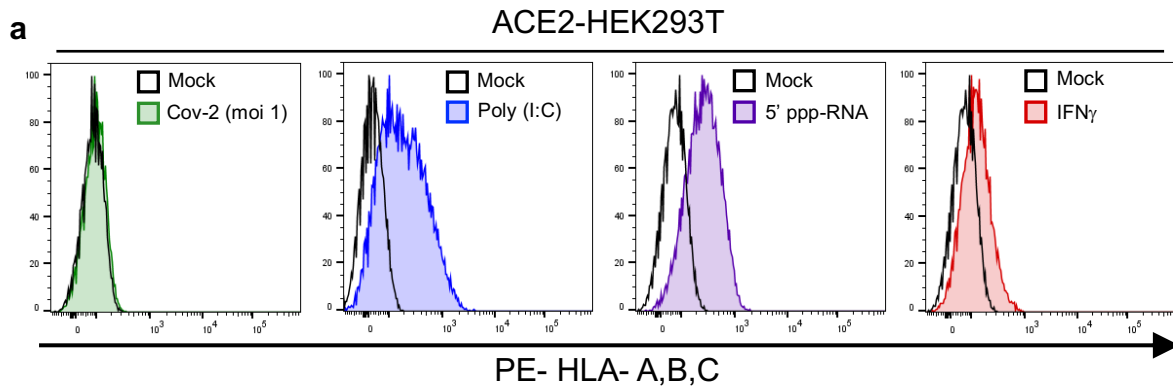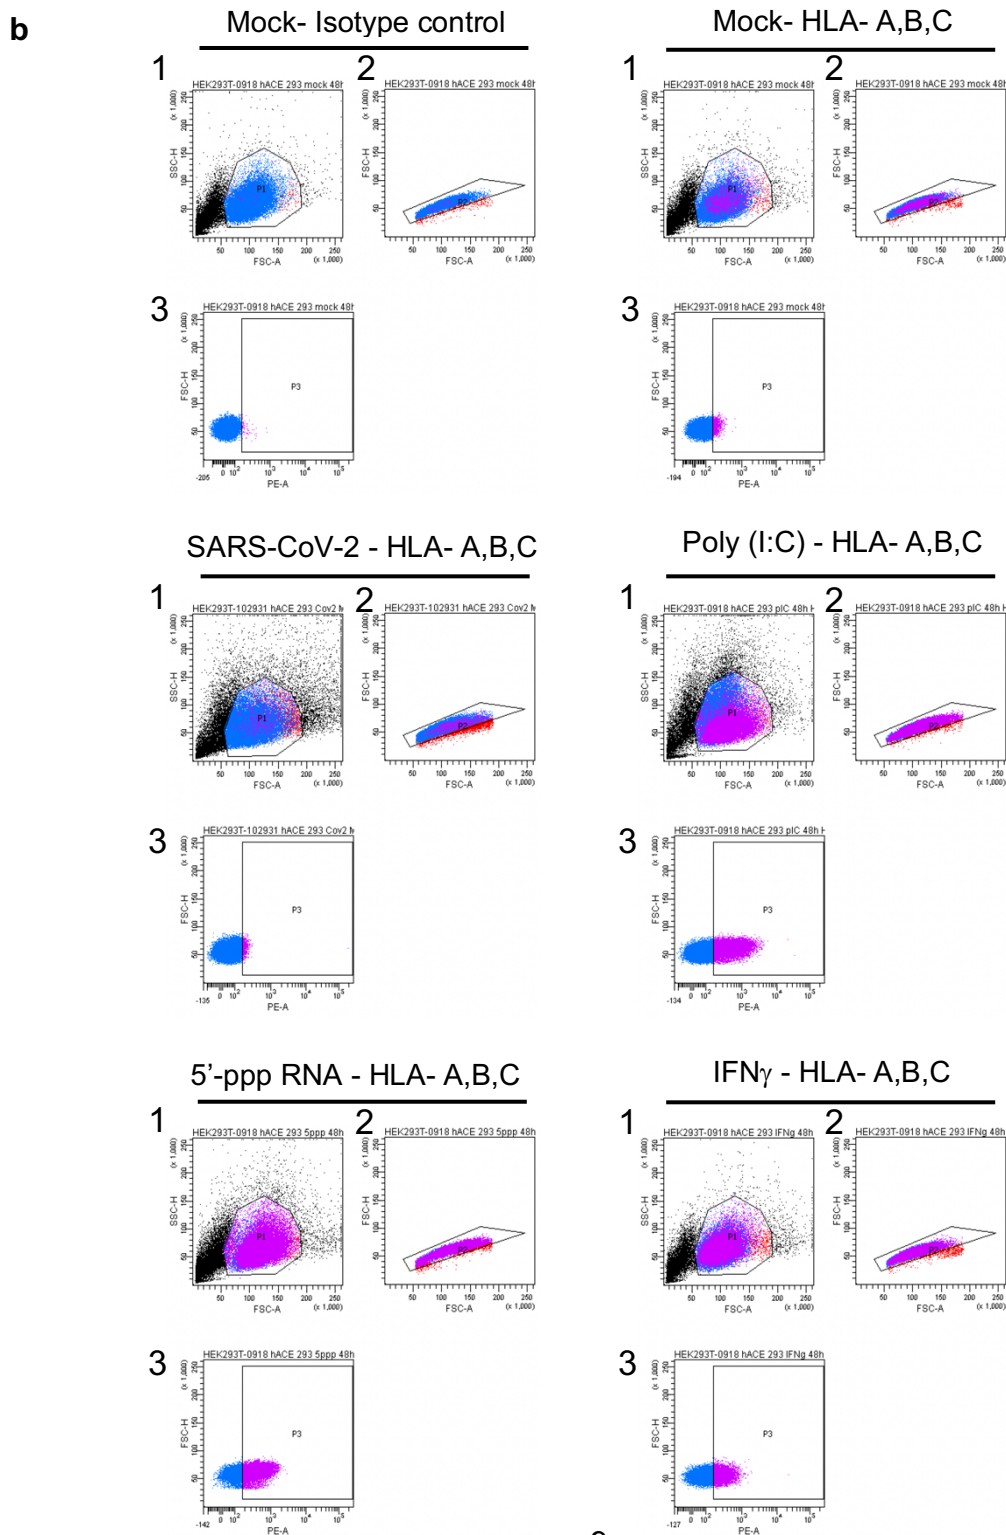

**Supplementary Fig. 5. SARS-CoV-2 inhibits upregulation of the surface expression of the MHC class I proteins** (a) Surface expression of MHC class I upon SARS-CoV-2 infection with indicated moi for 48 h in human ACE2-expressing HEK293T. Stimulation with poly(I:C) (200 ng), 5'ppp RNA (200 ng), or IFN $\gamma$  (100 U/ml) for 48 h were used as positive controls. (b) The gating strategy for detection of the HLA- A,B,C surface expression in ACE2-HEK293T cells. The gating orders are indicated by numbers. Both isotype control and anti-HLA- A,B,C antibodies are conjugated with PE.

# Supplementary Fig. 6.

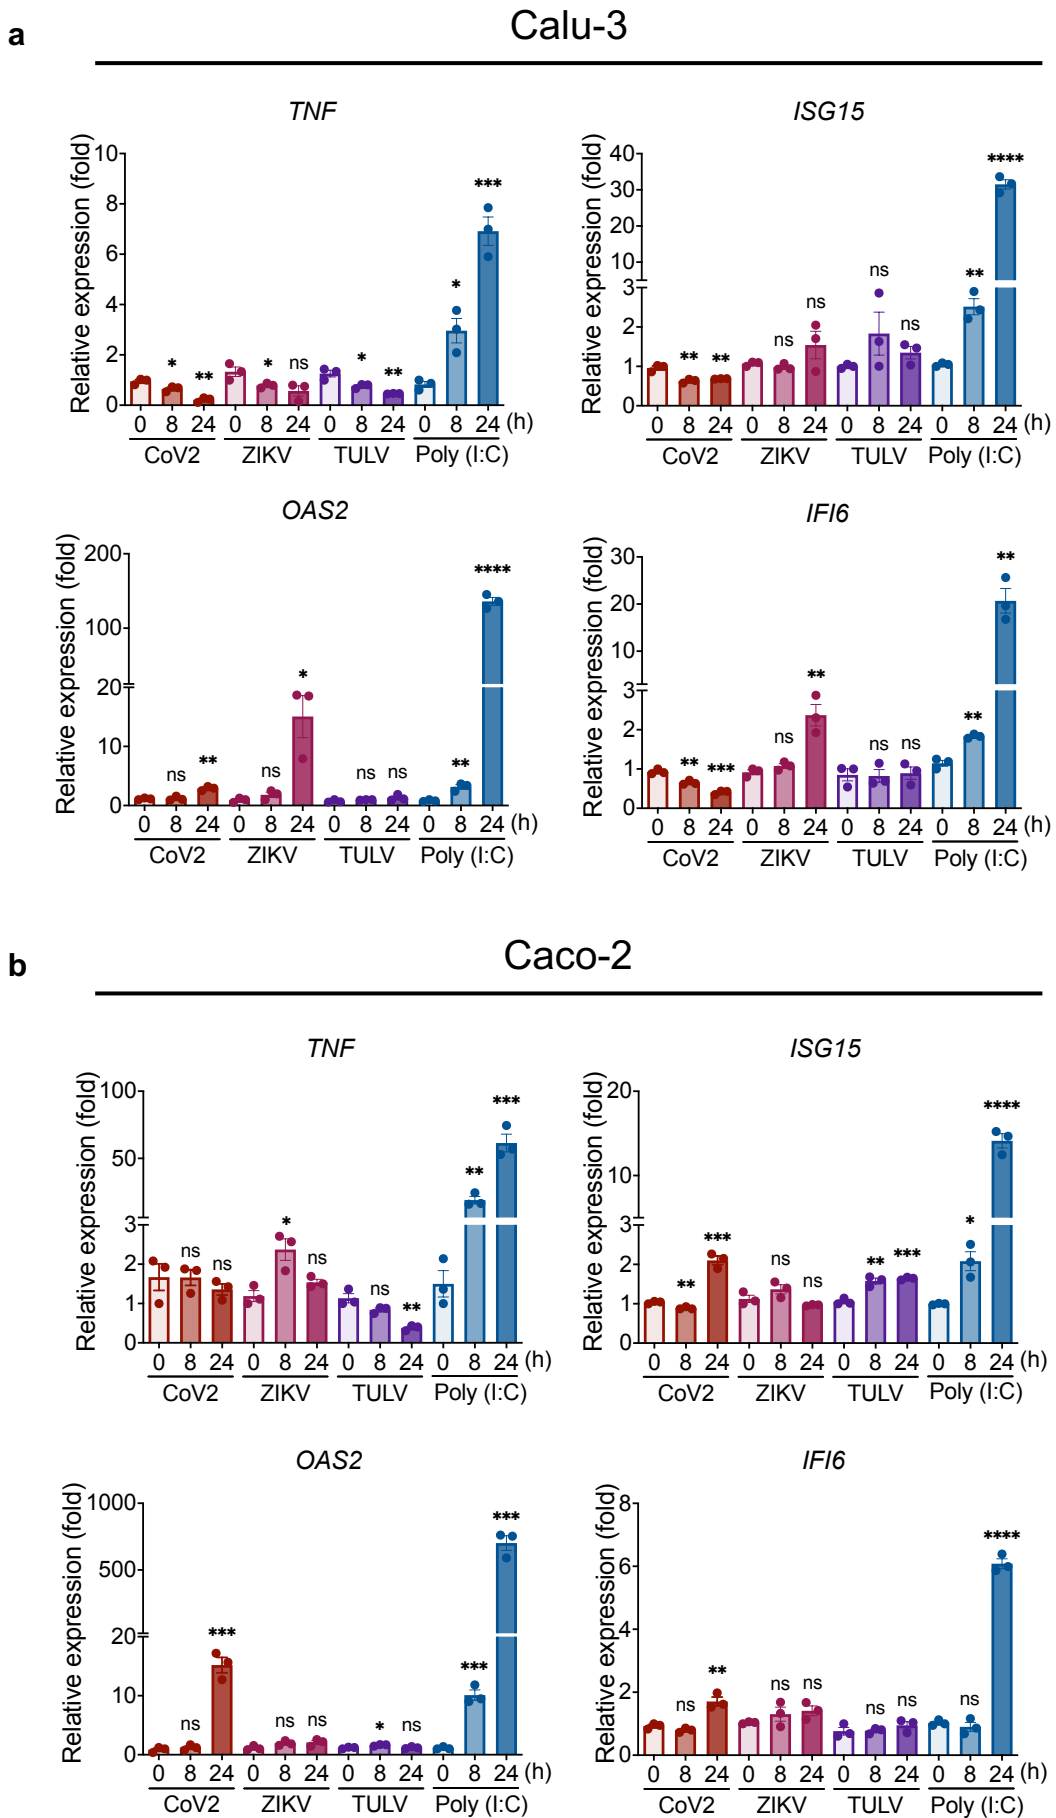

**Supplementary Fig. 6. Inhibition of innate immune responses by SARS-CoV-2, Zika virus, and Tula virus in the lung and colon epithelial carcinoma cell lines**

Quantitative real-time PCR analysis of the indicated gene expression level in SARS-CoV-2 (moi 3), ZIKV (moi 10), TULV (moi 5)-infected, or poly(I:C) (200 ng)-transfected Calu-3 (a) or Caco-2 (b) cells for the indicated time. The results are from 3 independent experiments. Two-tailed unpaired *t*-test, \*,  $P < 0.05$ ; \*\*,  $P < 0.01$ ; \*\*\*,  $P < 0.001$ ; \*\*\*\*,  $P < 0.0001$ ; ns, not significant. The error bars depict mean values  $\pm$  SD. The exact *p*-values are available in the Source Data.

## Supplementary Fig. 7.

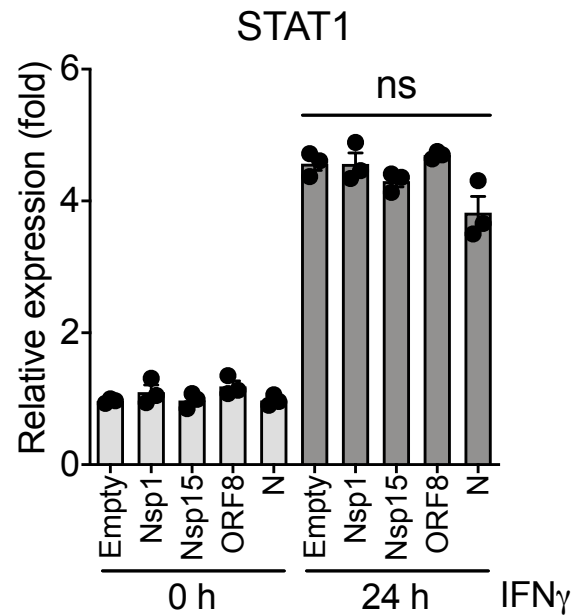

**Supplementary Fig. 7. SARS-CoV-2 Nsp1, Nsp15, ORF8, and N do not affect IFN $\gamma$ -induced STAT1 expression** Quantitative real-time PCR analysis of STAT1 gene expression level in the indicated SARS-CoV-2 gene expressing HEK293T cells stimulated with IFN $\gamma$  (100 U/ml) for the indicated time. The results are from 3 independent experiments. Two-tailed unpaired *t*-test, ns, not significant. The error bars represent mean values  $\pm$  SD.

## Supplementary Fig. 8.

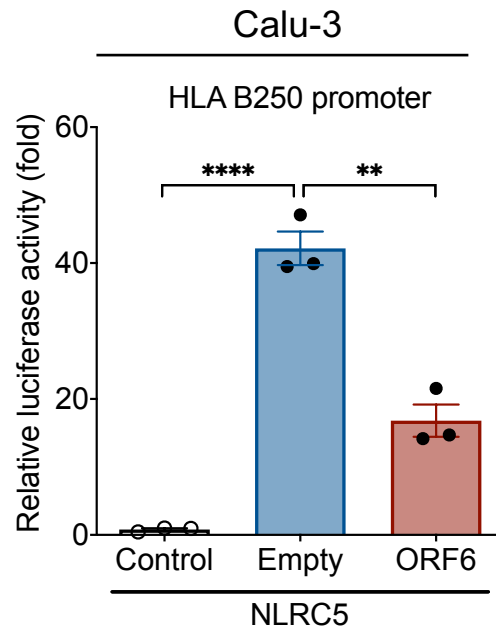

**Supplementary Fig. 8. SARS-CoV-2 ORF6 inhibits NLRC5 CITA function in lung epithelial carcinoma cells** Effect of SARS-CoV-2 ORF6 on NLRC5-mediated HLA-B promoter activity in Calu-3 cells. Calu-3 cells were transfected with empty control or HLA-B proximal promoter reporter construct, and plasmids expressing NLRC5 along with an empty or with SARS-CoV-2 ORF6 expressing plasmids. At 36 h after transfection, cells were collected to measure the luciferase activity. The results are from 3 independent experiments. Two-tailed unpaired *t*-test, \*\*,  $P < 0.01$ ; \*\*\*\*,  $P < 0.0001$ . The error bars depict mean values  $\pm$  SD. The exact *p*-values are available in the Source Data.

# Supplementary Fig. 9.

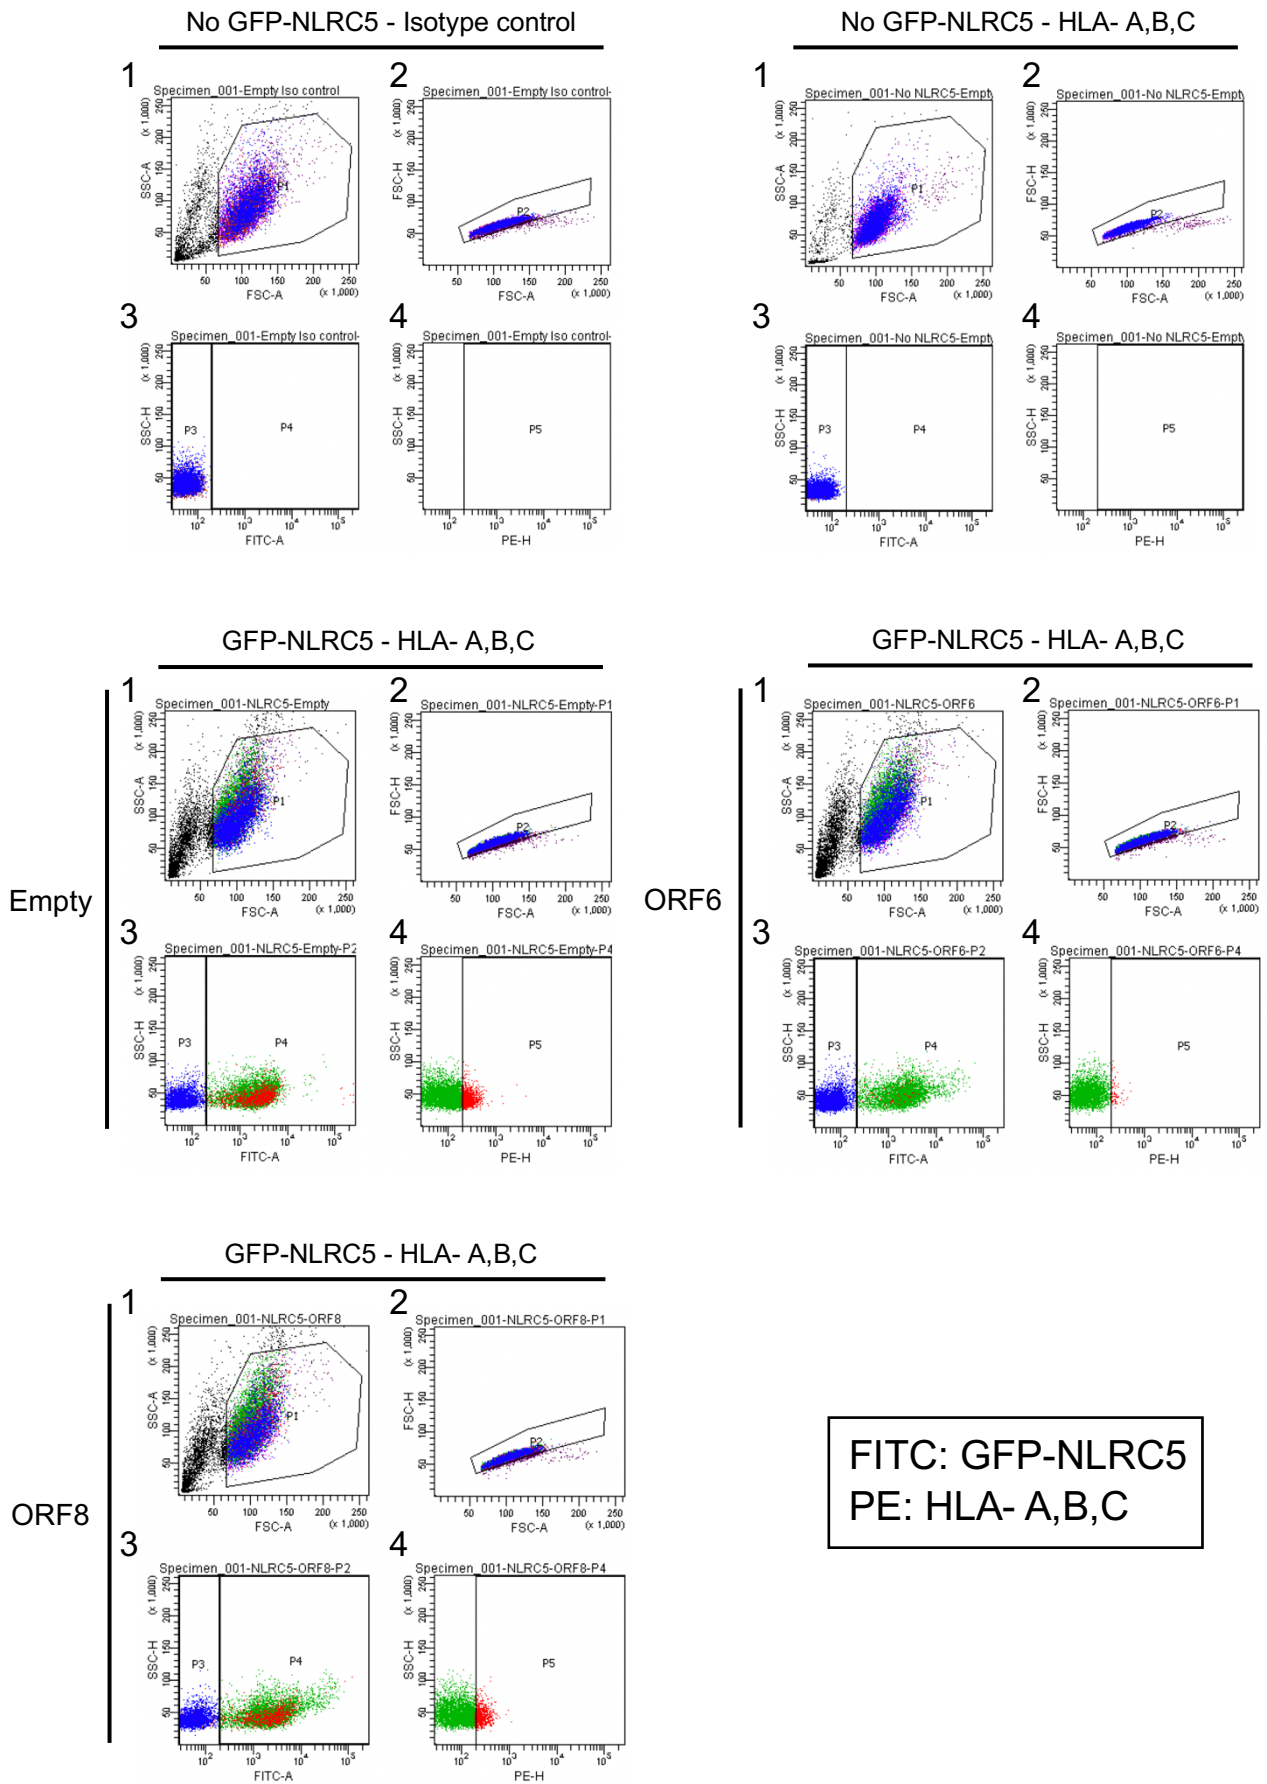

**Supplementary Fig. 9. SARS-CoV-2 ORF6 inhibits NLRC5-mediated MHC class I surface expression** The gating strategy for detection of the HLA- A,B,C surface expression corresponding to Fig. 5c. The gating orders are indicated by numbers. Both isotype control and anti-HLA- A,B,C antibodies are conjugated with PE. The FITC signal was used for gating the GFP-NLRC5 population.



# Supplementary Fig. 10.

**a**

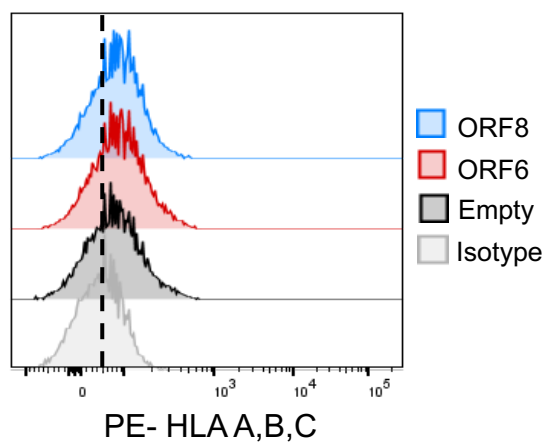

**b**

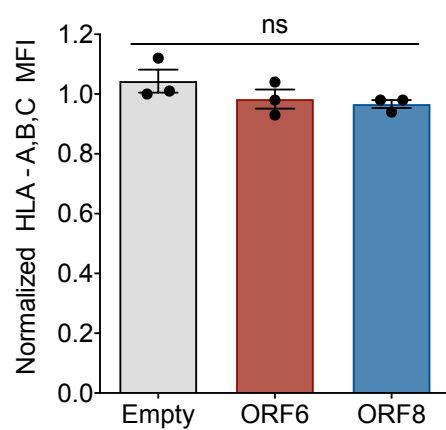

Empty - Isotype control

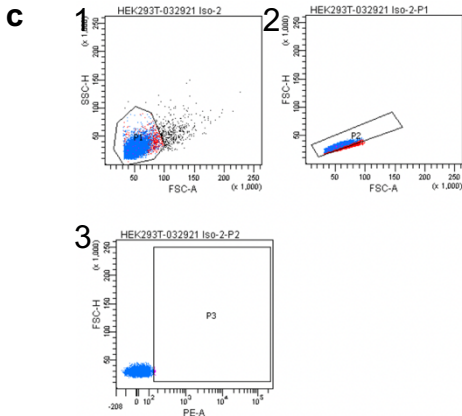

Empty - HLA- A,B,C - 1st

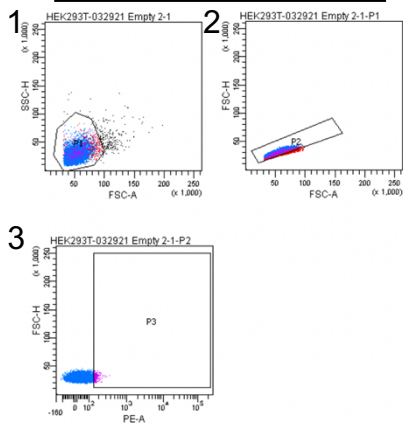

Empty - HLA- A,B,C - 2nd

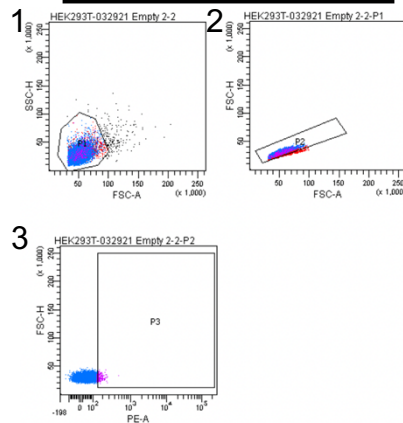

Empty - HLA- A,B,C - 3rd

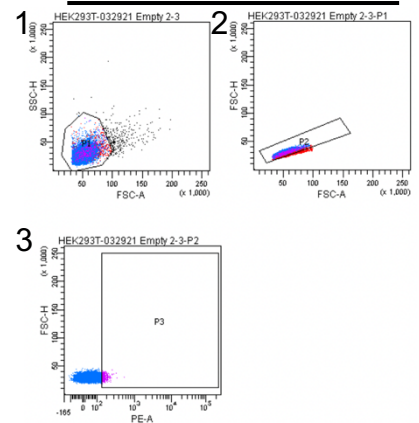

ORF6 - HLA- A,B,C - 1st

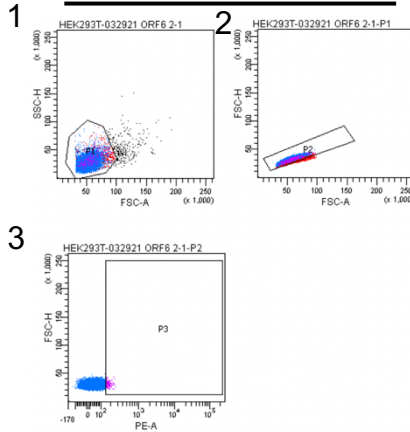

ORF6 - HLA- A,B,C - 2nd

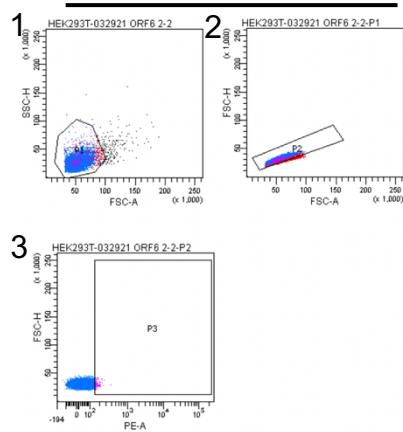

ORF6 - HLA- A,B,C - 3rd

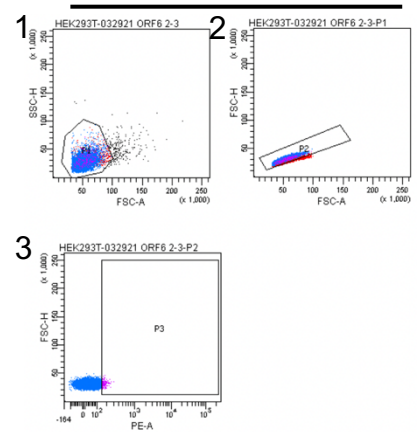

ORF8 - HLA- A,B,C - 1st

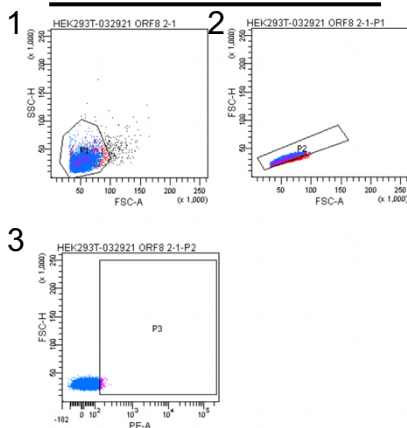

ORF8 - HLA- A,B,C - 2nd

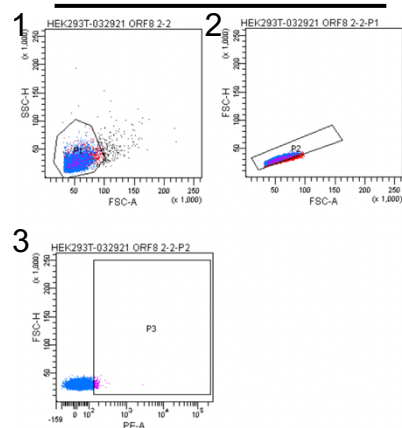

ORF8 - HLA- A,B,C - 3rd

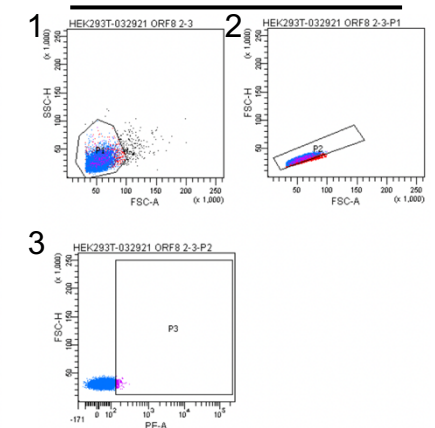

**Supplementary Fig. 10. Basal level of the MHC class I surface expression in steady-state condition is not affected by ORF6 or ORF8.** The surface expression of the HLA- A, B, and C on steady-state HEK293T cells was measured by flow cytometry analysis using either isotype control or antibody targeting HLA- A, B, and C and shown with **(a)** histogram and **(b)** mean fluorescence intensity (MFI). The results shown here are from 3 independent experiments. Two-tailed unpaired *t*-test, ns, not significant. The error bars represent mean values  $\pm$  SD. **(c)** Gating strategy for detection of the HLA- A,B,C surface expression. The gating orders are indicated by numbers. Both isotype control and anti-HLA- A,B,C antibodies are conjugated with PE.

# Supplementary Fig. 11.

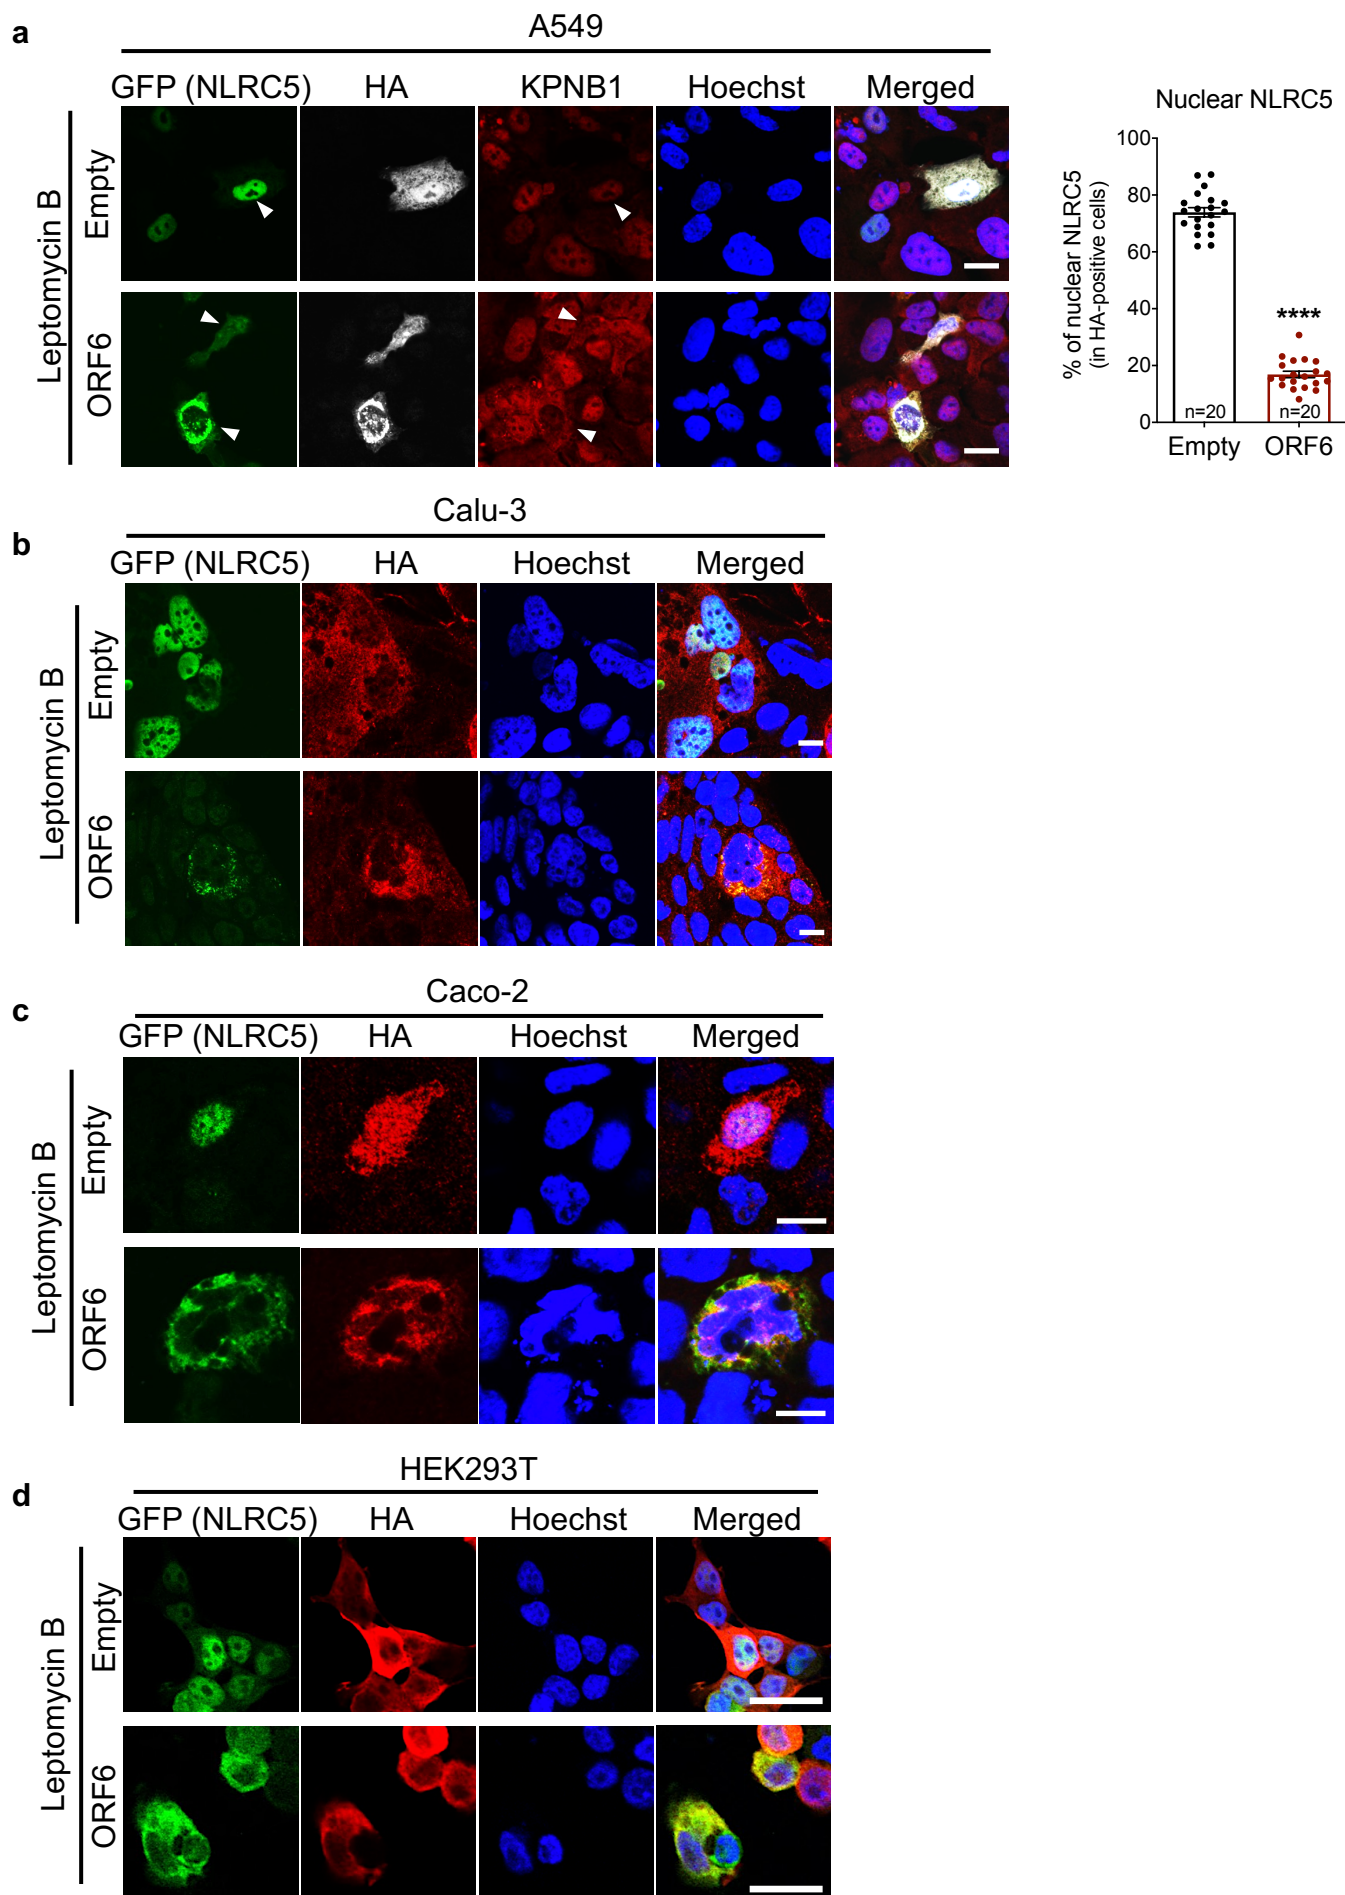

**Supplementary Fig. 11. SARS-CoV-2 ORF6 inhibits nuclear translocation of NLRC5 in various epithelial cell lines** Effect of SARS-CoV-2 ORF6 on the cellular localization of NLRC5. (a) A549, (b) Calu-3, (c) Caco-2, and (d) HEK293T cells were transfected with plasmids expressing GFP-tagged NLRC5, along with either HA alone or HA-tagged SARS-CoV-2 ORF6. At 24 h after transfection, cells were treated with 100 nM of Leptomycin B for 8 h, and then cellular localization of the indicated proteins was analyzed by a confocal microscope. Cellular localization of the endogenous KPNB1 in HA-empty or HA-ORF6 expressing A549 cells was indicated with a white arrow. Quantitative comparison of the nuclear NLRC5 signal intensity (% of nuclear signal intensity / total cell signal intensity) in A549 cells is shown with a bar graph analyzed by ImageJ. The scale bar indicates 20  $\mu$ m. Two-tailed unpaired *t*-test, \*\*\*\*,  $P < 0.0001$ . The error bars depict mean values  $\pm$  SD. The results shown are the representative data from the multiple images taken (2-8 images, n=2 biological replicates) for each experiment.

# Supplementary Fig. 12.

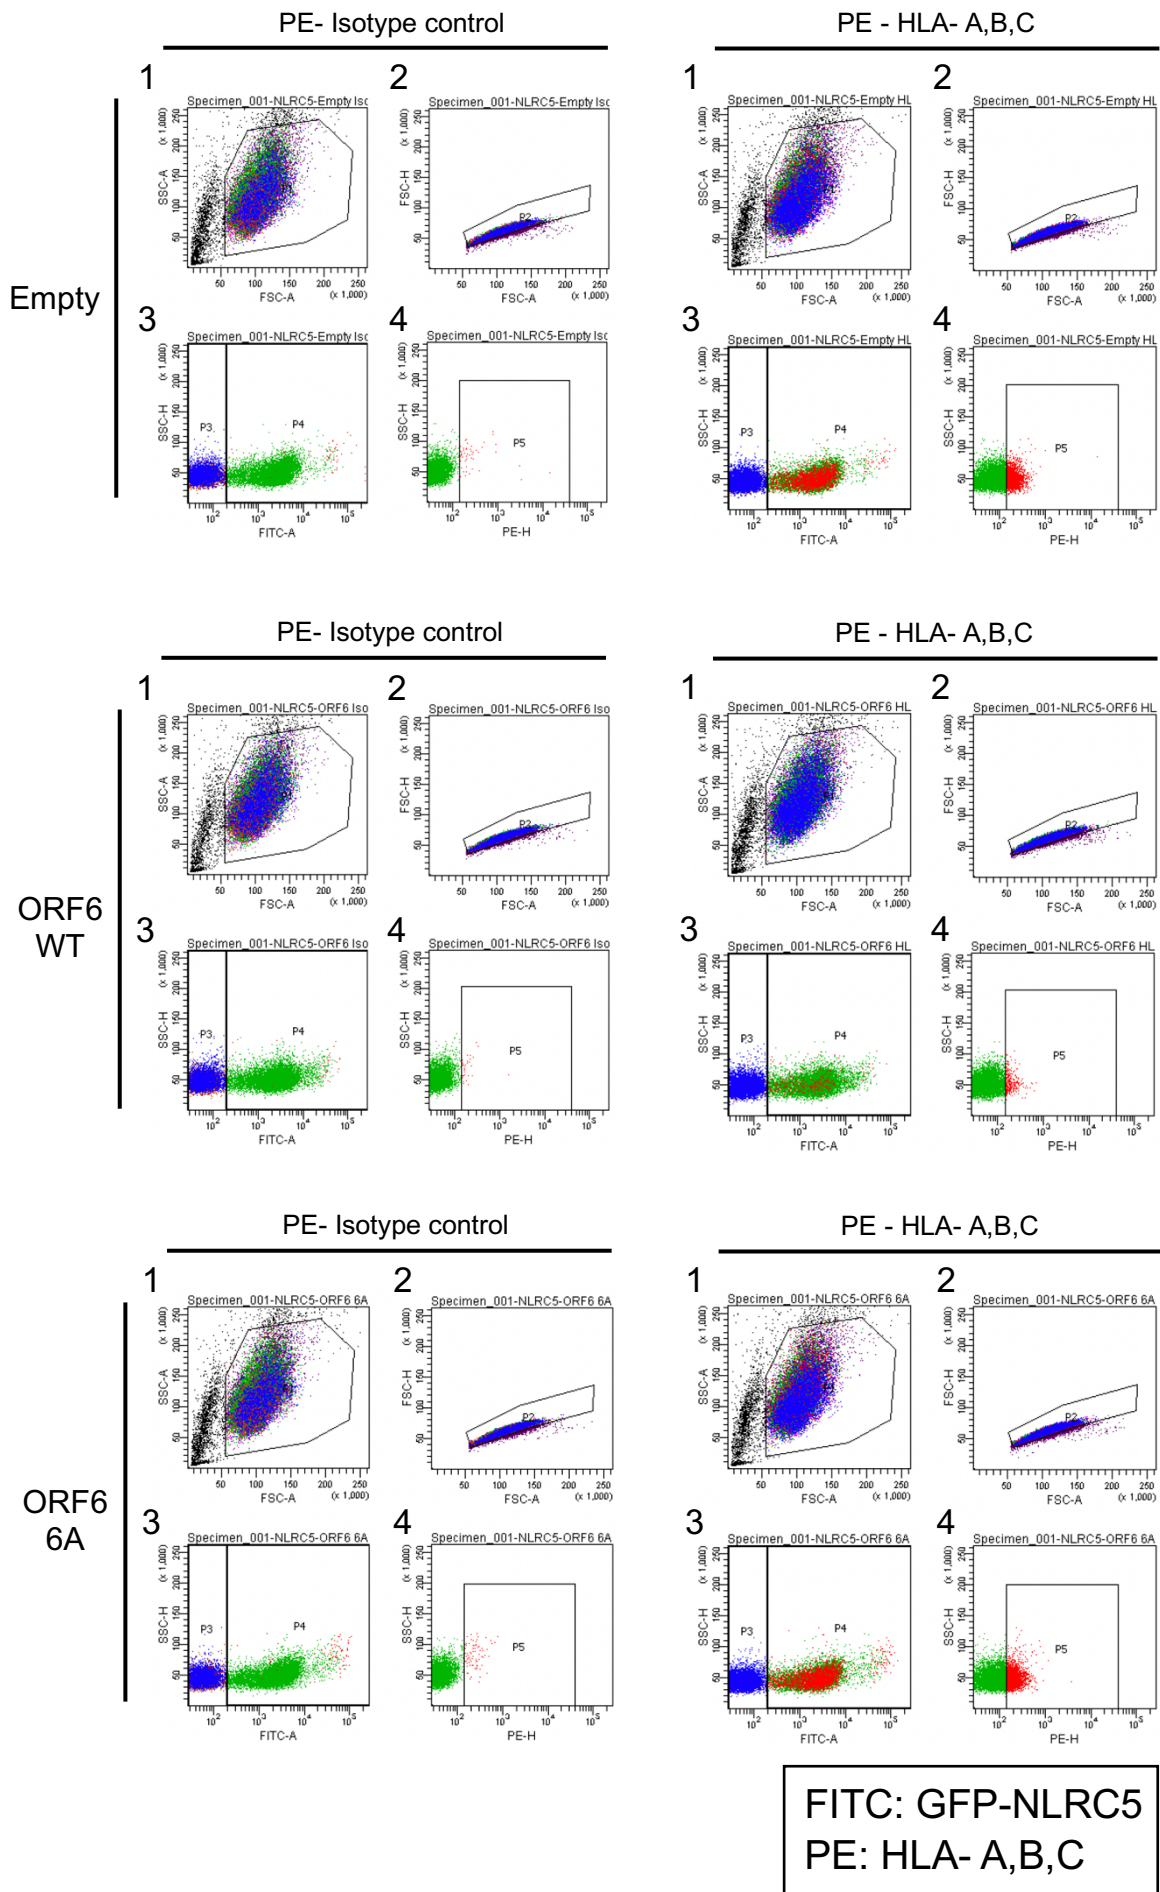

**Supplementary Fig. 12. Carboxy terminus of SARS-CoV-2 ORF6 is involved in inhibition of the NLRC5-mediated MHC class I surface expression** The gating strategy for detection of HLA- A,B,C surface expression corresponding to Fig. 7b. The gating orders are indicated by numbers. Both isotype control and anti-HLA- A,B,C antibodies are conjugated with PE. The FITC signal was used for gating the GFP-NLRC5 population.

Supplementary Table 1. DNA oligo used for cloning.

| Use                                                   | Primer name and sequence (5' to 3')  |                                                                     | Note                                                        |
|-------------------------------------------------------|--------------------------------------|---------------------------------------------------------------------|-------------------------------------------------------------|
| Cloning or subcloning of SARS-CoV-2 genes             | nsp1-F                               | ATAGGATCCATGGAGAGCCTTGTC                                            | Using BamHI and XbaI                                        |
|                                                       | nsp1-R                               | ATTCTAGATTACTGCTATGTTTAGTGTTC                                       |                                                             |
|                                                       | nsp15-F                              | ATAGGATCCATGAGTTTAGAAAATGT                                          |                                                             |
|                                                       | nsp15-R                              | ATTCTAGATTATTGTAATTTTGGGTA                                          |                                                             |
|                                                       | ORF6-F                               | ATAGGATCCATGTTTCATCTCGTTG                                           |                                                             |
|                                                       | ORF6-R                               | ATTCTAGATTAATCAATCTCCATTGGTTG                                       |                                                             |
|                                                       | ORF8-F                               | ATAGGATCCATGAAATTTCTTGTTTC                                          |                                                             |
|                                                       | ORF8-R                               | ATTCTAGATTAGATGAAATCTAAAAACAAC                                      |                                                             |
|                                                       | N-F                                  | ATAGGATCCATGTCTGATAATGGAC                                           |                                                             |
|                                                       | N-R                                  | ATTCTAGATTAGGCCTGAGTTGAG                                            |                                                             |
| Cloning or subcloning of human karyopherin genes      | KPNA1-F                              | CTAGAATTCACCACCCAGGAAAAGAGAAGCTTT                                   | Using EcoRI and XbaI                                        |
|                                                       | KPNA1-R                              | AAGTCTAGATCAAAGCTGGAAACCTTCCATAGG                                   | Using BamHI and XbaI                                        |
|                                                       | KPNA2-F                              | AATGGATCCATGTCCACCAACGAGAATGCTAATA                                  |                                                             |
|                                                       | KPNA2-R                              | AATTCTAGACTAAAAGTTAAAGGTCCCAGGAGCC                                  | Using EcoRI and XhoI                                        |
|                                                       | KPNA3-F                              | AAAGAATTCATGGCCGAGAACCCAGCTTGGAGAA                                  |                                                             |
|                                                       | KPNA3-R                              | CGGCTCGAGTTAAAAATTAATTTCTTTTGTGTTGAAGGTTGGC                         | Using BamHI and XhoI                                        |
|                                                       | KPNA4-F                              | AAAGGATCCATGGCGGACAACGAGAAACTGGACA                                  |                                                             |
|                                                       | KPNA4-R                              | GGAATCGAGCTAAAACCTGGAACCTTCTGTTGGT                                  | Using EcoRI and XhoI                                        |
|                                                       | KPNA5-F                              | AAAGAATTCATGGATGCCATGGCTAGTCCAGGGAAA                                |                                                             |
|                                                       | KPNA5-R                              | GGAATCGAGTTAAAGTTGAAATCCATCCATTGGTGC                                | Using EcoRI and XbaI                                        |
|                                                       | KPNA6-F                              | AAAGAATTCGAGACCATGGCGAGCCCAGGGAAAAGCAA                              |                                                             |
|                                                       | KPNA6-R                              | AAATCTAGATTATAGCTGGAAGCCCTCCATGGGGGCT                               | Using BamHI and XbaI                                        |
|                                                       | KPNB1 WT-F                           | AAAGGATCCATGGAGCTGATCACCATTCTCGAG                                   |                                                             |
|                                                       | KPNB1 WT-R                           | GCCTCTAGATCAAGCTTGGTTCTTCAGTTTCCT                                   |                                                             |
| KPNB1 DN-F                                            | AAAGGATCCATGGCAAATCCAGGAAACAGTCAGGTT |                                                                     |                                                             |
| KPNB1 DN-R                                            | AGGTCTAGATTAAGCACTGAGACCCTCAATCAGACA | Using KpnI and XhoI (Synthesized oligo)                             |                                                             |
| Cloning of the reporter gene for IRF1 GAS element     | IRF1 3 × GAS-F                       |                                                                     | CCTGATTTCCCCGAAATGACCTGATTTCCCCGAAATGACCTGATTTCCCCGAAATGACC |
|                                                       | IRF1 3 × GAS-R                       | TCGAGGTCATTTCCGGGAAATCAGGTCATTTCCGGGAAATCAGGTCATTTCCGGGAAATCAGGGTAC |                                                             |
| Cloning of the reporter gene for human NLRC5 promoter | NLRC5 promoter-F                     | GGGGTACCCTGGGAGTCACACAC                                             | Using KpnI and XhoI                                         |
|                                                       | NLRC5 promoter-R                     | CCCTCGAGCTCCGTGCAGAATTCGA                                           |                                                             |



Supplementary Table 2. DNA oligo used for qPCR analysis.

| Use                                       | Oligo name and sequence (5' to 3') |                            | Note              |
|-------------------------------------------|------------------------------------|----------------------------|-------------------|
| qPCR primers for human gene analysis      | NLRC5-F                            | GTCATCCGCCTCTGGAATAAC      | SYBR green system |
|                                           | NLRC5-R                            | CTGGTTGTCAAAGAAGGCAAAG     |                   |
|                                           | HLA A-F                            | AAAAGGAGGGAGTTACACTCAGG    |                   |
|                                           | HLA A-R                            | GCTGTGAGGGACACATCAGAG      |                   |
|                                           | HLA B-F                            | CTACCCTGCGGAGATCA          |                   |
|                                           | HLA B-R                            | ACAGCCCAGGCCAGCAACA        |                   |
|                                           | B2M-F                              | CCACTGAAAAAGATGAGTATGCCT   |                   |
|                                           | B2M-R                              | CCAATCCAAATGCGGCATCTTCA    |                   |
|                                           | TAP1-F                             | AGGGCTGGCTGGCTGCTTTGA      |                   |
|                                           | TAP1-R                             | ACGTGGCCCATGGTGTGTTAT      |                   |
|                                           | PSMB9-F                            | CGAGAGGACTTGTCTGCACATC     |                   |
|                                           | PSMB9-R                            | CACCAATGGCAAAAAGGCTGTCTG   |                   |
|                                           | STAT1-F                            | ATGGCAGTCTGGCGGCTGAATT     |                   |
|                                           | STAT1-R                            | CCAAACCAGGCTGGCACAATTG     |                   |
|                                           | IRF1-F                             | GAGGAGGTGAAAGACCAGAGCA     |                   |
|                                           | IRF1-R                             | TAGCATCTCGGCTGGACTTCGA     |                   |
|                                           | IFNB-F                             | AGCTGCAGCAGTTCCAGAAG       |                   |
|                                           | IFNB-R                             | AGTCTCATTCCAGCCAGTGC       |                   |
|                                           | IL6-F                              | AGACAGCCACTCACCTCTTCAG     |                   |
|                                           | IL6-R                              | TTCTGCCAGTGCCTCTTTGCTG     |                   |
|                                           | TNF-F                              | CTCTTCTGCCTGCTGCACTTTG     |                   |
|                                           | TNF-R                              | ATGGGCTACAGGCTTGCTCACTC    |                   |
|                                           | ISG15-F                            | AGATCACCCAGAAGATCG         |                   |
|                                           | ISG15-R                            | TGTTATTCTCACCAGGATG        |                   |
|                                           | OAS2-F                             | GCTTCCGACAATCAACAGCCAAG    |                   |
|                                           | OAS2-R                             | CTTGACGATTTTGTGCCGCTCG     |                   |
|                                           | IFI6-F                             | TGATGAGCTGGTCTGCGATCCT     |                   |
|                                           | IFI6-R                             | GTAGCCCATCAGGGCACCAATA     |                   |
| GAPDH-F                                   | GAAGGTGAAGTCCGGAGT                 |                            |                   |
| GAPDH-R                                   | GAAGATGGTGTATGGGATTTT              |                            |                   |
| qPCR primers for SARS-CoV-2 gene analysis | SARS-CoV-2-E-F                     | ACAGGTACGTTAATAGTTAATAGCGT |                   |
|                                           | SARS-CoV-2-E-R                     | ATATTGCAGCAGTACGCACACA     |                   |
