# Supplementary material for: SARS-CoV-2 inhibits induction of the MHC class I pathway by targeting the STAT1-IRF1-NLRC5 axis
Source: PubMed Central journal article supplement (PMC8594428; doi:10.1038/s41467-021-26910-8), 2021-11-15
Supplement: 41467_2021_26910_MOESM3_ESM.pdf [file 41467_2021_26910_MOESM3_ESM.pdf]

## Reporting Summary

Nature Research wishes to improve the reproducibility of the work that we publish. This form provides structure for consistency and transparency in reporting. For further information on Nature Research policies, see our [Editorial Policies](#) and the [Editorial Policy Checklist](#).

### Statistics

For all statistical analyses, confirm that the following items are present in the figure legend, table legend, main text, or Methods section.

n/a Confirmed

- The exact sample size ( $n$ ) for each experimental group/condition, given as a discrete number and unit of measurement
- A statement on whether measurements were taken from distinct samples or whether the same sample was measured repeatedly
- The statistical test(s) used AND whether they are one- or two-sided  
*Only common tests should be described solely by name; describe more complex techniques in the Methods section.*
- A description of all covariates tested
- A description of any assumptions or corrections, such as tests of normality and adjustment for multiple comparisons
- A full description of the statistical parameters including central tendency (e.g. means) or other basic estimates (e.g. regression coefficient) AND variation (e.g. standard deviation) or associated estimates of uncertainty (e.g. confidence intervals)
- For null hypothesis testing, the test statistic (e.g.  $F$ ,  $t$ ,  $r$ ) with confidence intervals, effect sizes, degrees of freedom and  $P$  value noted  
*Give  $P$  values as exact values whenever suitable.*
- For Bayesian analysis, information on the choice of priors and Markov chain Monte Carlo settings
- For hierarchical and complex designs, identification of the appropriate level for tests and full reporting of outcomes
- Estimates of effect sizes (e.g. Cohen's  $d$ , Pearson's  $r$ ), indicating how they were calculated

*Our web collection on [statistics for biologists](#) contains articles on many of the points above.*

### Software and code

Policy information about [availability of computer code](#)

Data collection No software was used for data collection

Data analysis For bioinformatic analyses (Figure 1, Supplementary Figure 1a), R version 3.6.0 was used with RStudio 1.1.463 and the following libraries: ggpubr 0.2.5, dplyr 0.8.4, DESeq2 1.26, ComplexHeatmap 2.2.0, stringr 1.4.0, ggplot2 3.3.2, dplyr 1.0.7, plyr 1.8.4 and ggbeeswarm 0.6.0. Scripts used to perform processing and generate figures can be found at <https://github.com/scho75/RNA-seq-data-mining-analysis>. All non-RNA seq statistical analyses were performed as indicated in figure legends using GraphPad Prism 9 (GraphPad Software, USA). For quantification of the immunofluorescence images and protein bands from Western blot analysis was performed with ImageJ software.

For manuscripts utilizing custom algorithms or software that are central to the research but not yet described in published literature, software must be made available to editors and reviewers. We strongly encourage code deposition in a community repository (e.g. GitHub). See the Nature Research [guidelines for submitting code & software](#) for further information.

### Data

Policy information about [availability of data](#)

All manuscripts must include a [data availability statement](#). This statement should provide the following information, where applicable:

- Accession codes, unique identifiers, or web links for publicly available datasets
- A list of figures that have associated raw data
- A description of any restrictions on data availability

Data availability

The RNAseq data used in this study are available in the NCBI Gene Expression Omnibus (GEO) Repository under accession code GSE152075 [<https://www.ncbi.nlm.nih.gov/geo/query/acc.cgi?acc=GSE152075>] for the nasopharyngeal swab dataset and under accession code GSE147507 [<https://www.ncbi.nlm.nih.gov/geo/query/acc.cgi?acc=GSE147507>] for the normal human bronchial epithelial cell dataset. Source data for scRNA-seq data in Supplementary

Figure 1b can be accessed on the cellxgene platform ([https://cellxgene.cziscience.com/e/krasnow\\_lab\\_human\\_lung\\_cell\\_atlas\\_10x-1-remixed.cxg/](https://cellxgene.cziscience.com/e/krasnow_lab_human_lung_cell_atlas_10x-1-remixed.cxg/)). The source data underlying Figs 1d, 2a-b, 3a-f, 4a-e, 5a-b, 5d-e, 6b-f, 7a, 7c-d and Supplementary Figures 2, 3a-b, 6a-b, 7, 8, 10b, and 11a are provided as a Source Data file. No additional dataset has been generated in the current study.

#### Code availability

Scripts used to perform processing and generate figures can be found at <https://github.com/scho75/RNA-seq-data-mining-analysis>.

## Field-specific reporting

Please select the one below that is the best fit for your research. If you are not sure, read the appropriate sections before making your selection.

Life sciences  Behavioural & social sciences  Ecological, evolutionary & environmental sciences

For a reference copy of the document with all sections, see [nature.com/documents/nr-reporting-summary-flat.pdf](https://www.nature.com/documents/nr-reporting-summary-flat.pdf)

## Life sciences study design

All studies must disclose on these points even when the disclosure is negative.

|                 |                                                                                                                                                                                                                                                                                                                                                                                                                                                                                                                                                       |
|-----------------|-------------------------------------------------------------------------------------------------------------------------------------------------------------------------------------------------------------------------------------------------------------------------------------------------------------------------------------------------------------------------------------------------------------------------------------------------------------------------------------------------------------------------------------------------------|
| Sample size     | Sample sizes were not predetermined based on statistical methods, but were chosen according to the standards of the field (at least three independent biological replicates for each condition), which generated a sufficient statistics for the effect sizes of interest.                                                                                                                                                                                                                                                                            |
| Data exclusions | No data were excluded.                                                                                                                                                                                                                                                                                                                                                                                                                                                                                                                                |
| Replication     | All studies performed by RT-qPCR or reporter assay were conducted with three independent experiments and the p-value of each experiment is provided by Student's t-test. For immunofluorescence analysis, 16 to 60 cells per group were counted and represented as a bar graph with a p-value by Student's t-test. For the quantification of the Western blot band shown in Fig. 5e, three independent experiments were conducted and the band intensity was quantified using ImageJ software. The average band intensity was shown with a bar graph. |
| Randomization   | No randomization was necessary for this study because investigators were comparing designed samples under well controlled conditions (e.g. mock vs infected or Empty vector control vs effector protein encoding vector). No human or animal subjects were used in the study. Randomization is not generally used in this field.                                                                                                                                                                                                                      |
| Blinding        | Investigators were not blinded. Blinding during collection was not needed because conditions were well controlled. Blinding is also not necessary because the results are quantitative and did not require subjective judgment or interpretation. Blinding is not typically used in the field.                                                                                                                                                                                                                                                        |

## Reporting for specific materials, systems and methods

We require information from authors about some types of materials, experimental systems and methods used in many studies. Here, indicate whether each material, system or method listed is relevant to your study. If you are not sure if a list item applies to your research, read the appropriate section before selecting a response.

### Materials & experimental systems

| n/a                                 | Involved in the study                                     |
|-------------------------------------|-----------------------------------------------------------|
| <input type="checkbox"/>            | <input checked="" type="checkbox"/> Antibodies            |
| <input type="checkbox"/>            | <input checked="" type="checkbox"/> Eukaryotic cell lines |
| <input checked="" type="checkbox"/> | <input type="checkbox"/> Palaeontology and archaeology    |
| <input checked="" type="checkbox"/> | <input type="checkbox"/> Animals and other organisms      |
| <input checked="" type="checkbox"/> | <input type="checkbox"/> Human research participants      |
| <input checked="" type="checkbox"/> | <input type="checkbox"/> Clinical data                    |
| <input checked="" type="checkbox"/> | <input type="checkbox"/> Dual use research of concern     |

### Methods

| n/a                                 | Involved in the study                              |
|-------------------------------------|----------------------------------------------------|
| <input checked="" type="checkbox"/> | <input type="checkbox"/> ChIP-seq                  |
| <input type="checkbox"/>            | <input checked="" type="checkbox"/> Flow cytometry |
| <input checked="" type="checkbox"/> | <input type="checkbox"/> MRI-based neuroimaging    |

## Antibodies

#### Antibodies used

anti-FLAG antibody (Sigma), Clone: M2, Cat#: F3165-1MG  
 anti-HA antibody (BioLegend), Clone: 16B12, Cat#: 901513  
 anti-TBK1 antibody (Cell Signaling), Clone: E8I3G, Cat#: 38066  
 anti-phospho-TBK1 antibody (Cell Signaling), Clone: D52C2, Cat#: 5483  
 anti-STAT1 antibody (Cell Signaling), Clone: D1K9Y, Cat#: 14994  
 anti-phospho-STAT1 antibody (Cell Signaling), Clone: 58D6, Cat#: 9167  
 anti-SARS-CoV-2 N antibody (GeneTex), Clone: polyclonal, Cat#: GTX135357  
 anti-GFP antibody (Proteintech), Clone: 1E10H7, Cat#: 66002-1-Ig  
 anti-Lamin B1 (Cell Signaling), Clone: D9V6H, Cat#: 13435  
 anti-Tubulin (Proteintech), Clone: polyclonal, Cat#: 11224-1-AP

anti-GAPDH (Proteintech), Clone: 1E6D9, Cat#: 60004-1-Ig  
 anti-beta actin (Proteintech), Clone: 2D4H5, Cat#: 66009-1-Ig  
 anti-rabbit IgG with HRP conjugate (GE Healthcare), Cat#: NA934V  
 anti-mouse IgG with HRP conjugate (GE Healthcare), Cat#: NA931V  
 anti-human HLA-A, B, C antibody, PE-conjugated (BioLegend), Clone: W6/32, Cat#: 311406  
 PE-conjugated isotype control, mouse IgG2a, k (BioLegend), Clone: MOPC-173, Cat#: 400213

Validation Antibodies were chosen based on the validation statements for species (Human) and application (Western blot, Immunofluorescence or Flow Cytometry) on the manufacturer's website.

## Eukaryotic cell lines

Policy information about [cell lines](#)

|                                                                      |                                                                                                                                                                              |
|----------------------------------------------------------------------|------------------------------------------------------------------------------------------------------------------------------------------------------------------------------|
| Cell line source(s)                                                  | Calu-3, ATCC , HTB-55™<br>HeLa, ATCC, CCL-2™<br>HEK293T, ATCC, CRL-11268™<br>A549, RIKEN Bio BRC, RCB0098<br>Caco-2, RIKEN Bio BRC, RCB0988<br>Huh-7, RIKEN Bio BRC, RCB1366 |
| Authentication                                                       | We have obtained low-passage cell lines from the providers and all cell lines are authenticated by STR method.                                                               |
| Mycoplasma contamination                                             | All cell lines were negative for mycoplasma contamination.                                                                                                                   |
| Commonly misidentified lines<br>(See <a href="#">ICLAC</a> register) | None of the used cell lines is listed in ICLAC database.                                                                                                                     |

## Flow Cytometry

### Plots

Confirm that:

- The axis labels state the marker and fluorochrome used (e.g. CD4-FITC).
- The axis scales are clearly visible. Include numbers along axes only for bottom left plot of group (a 'group' is an analysis of identical markers).
- All plots are contour plots with outliers or pseudocolor plots.
- A numerical value for number of cells or percentage (with statistics) is provided.

### Methodology

|                           |                                                                                                                                                                                                                                                                                                                                                                                                                                                                                                                                                                                                                                                                                                                                                                                                                                                                                                                                                                                                                                                                                                    |
|---------------------------|----------------------------------------------------------------------------------------------------------------------------------------------------------------------------------------------------------------------------------------------------------------------------------------------------------------------------------------------------------------------------------------------------------------------------------------------------------------------------------------------------------------------------------------------------------------------------------------------------------------------------------------------------------------------------------------------------------------------------------------------------------------------------------------------------------------------------------------------------------------------------------------------------------------------------------------------------------------------------------------------------------------------------------------------------------------------------------------------------|
| Sample preparation        | For sample preparation, cell cultures were harvested by trypsinization. Initial culture medium and wash buffer were collected to include detached cells. Cells were centrifuged (250g, 5min) and resuspended in the culture media. Then cell number was determined by a hemocytometer. After centrifugation, indicated numbers of cells were seeded in the culture plate. On the next day, cell cultures were treated as indicated in the manuscript and harvested by a cell scraper. Cells were centrifuged (250g, 5min) and resuspended in staining buffer (2% BSA in PBS). For the analysis of HLA surface expression, cells were stained with either isotype control (PE-conjugated mouse IgG2a, k (BioLegend), Clone: MOPC-173, Cat#: 400213, 1:100 dilution) or anti-human HLA- A,B,C antibody (PE-conjugated (BioLegend), Clone: W6/32, Cat#: 311406, 1:100 dilution) on ice for 30 min. After staining, cells were washed three times with staining buffer. Then, samples were analyzed by flow cytometry using BD Canto (BD Biosciences) at least 10.000 events were acquired per sample. |
| Instrument                | BD FACS Canto (BD Biosciences) equipped with 405nm,488nm and 640nm lasers.                                                                                                                                                                                                                                                                                                                                                                                                                                                                                                                                                                                                                                                                                                                                                                                                                                                                                                                                                                                                                         |
| Software                  | FlowJo                                                                                                                                                                                                                                                                                                                                                                                                                                                                                                                                                                                                                                                                                                                                                                                                                                                                                                                                                                                                                                                                                             |
| Cell population abundance | Cell sorting not employed                                                                                                                                                                                                                                                                                                                                                                                                                                                                                                                                                                                                                                                                                                                                                                                                                                                                                                                                                                                                                                                                          |
| Gating strategy           | Using the FSC/SSC gating, debris was removed by gating on the main cell population. For choosing a single cell population, FSC-H/FSC-A gating was used. The background intensity was determined by isotype control antibody. The positivity threshold for each cell line was defined based on the unstimulated sample (negative control). The identical positivity threshold was then applied to all samples within each experiment.                                                                                                                                                                                                                                                                                                                                                                                                                                                                                                                                                                                                                                                               |

- Tick this box to confirm that a figure exemplifying the gating strategy is provided in the Supplementary Information.
